# Supplementary material
Source: PubMed Central journal article supplement (PMC3523792)

(A)

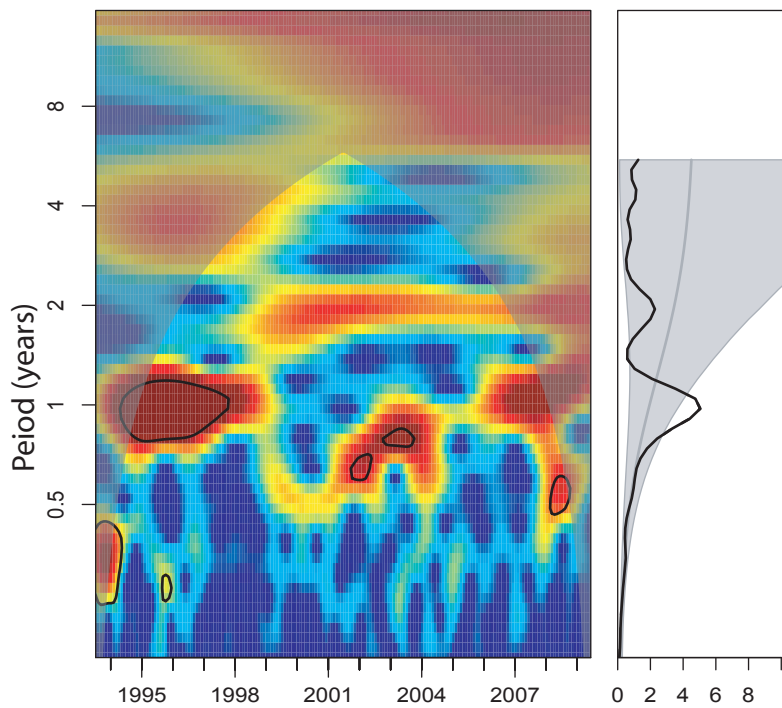

(B)

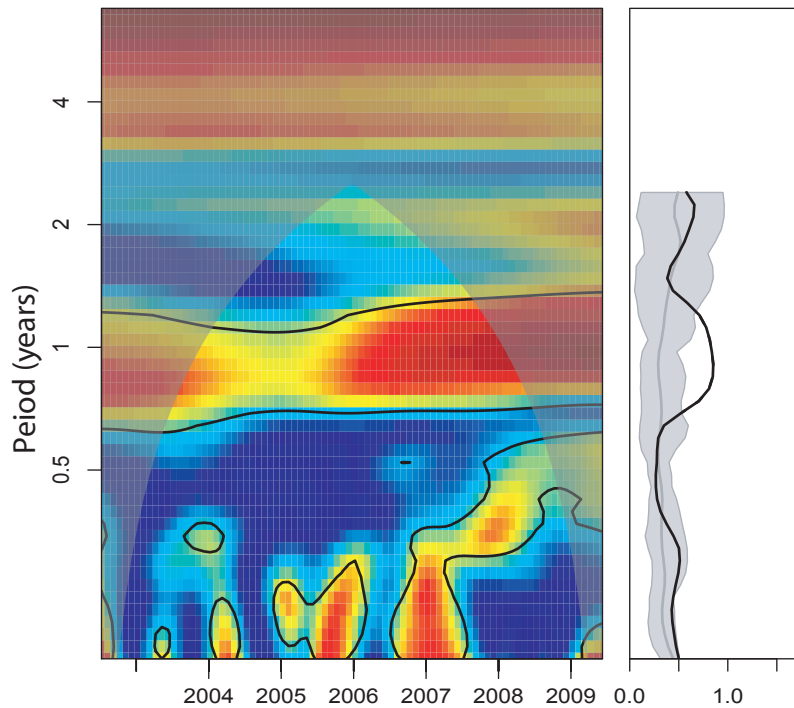

(C)

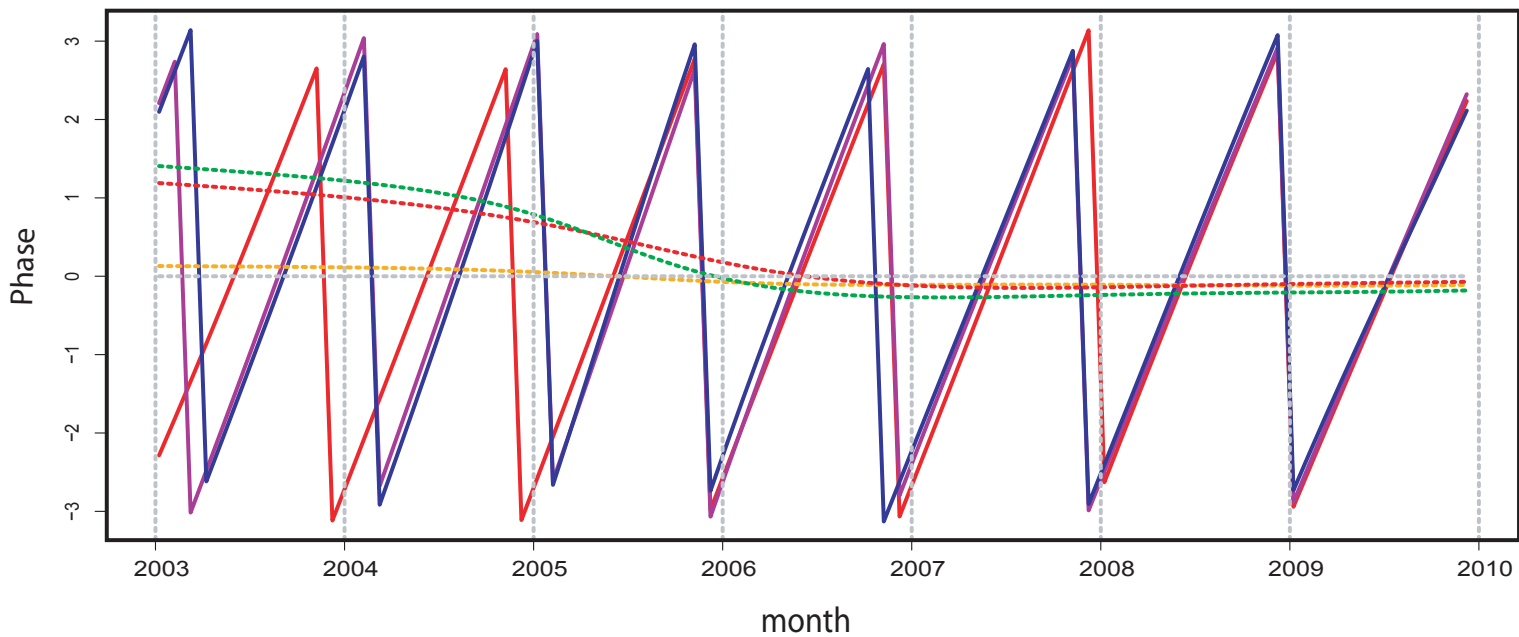

Supplement: supp_jis526_jis526supp_fig1.pdf [file supp_jis526_jis526supp_fig1.pdf]
